# Supplementary material
Source: PubMed Central journal article supplement (PMC3179126)
Supplement: 1111331108_pnas.1111331108_SI.pdf [file 1111331108_pnas.1111331108_SI.pdf]

# Supporting Information

Sartoretto et al. 10.1073/pnas.1111331108

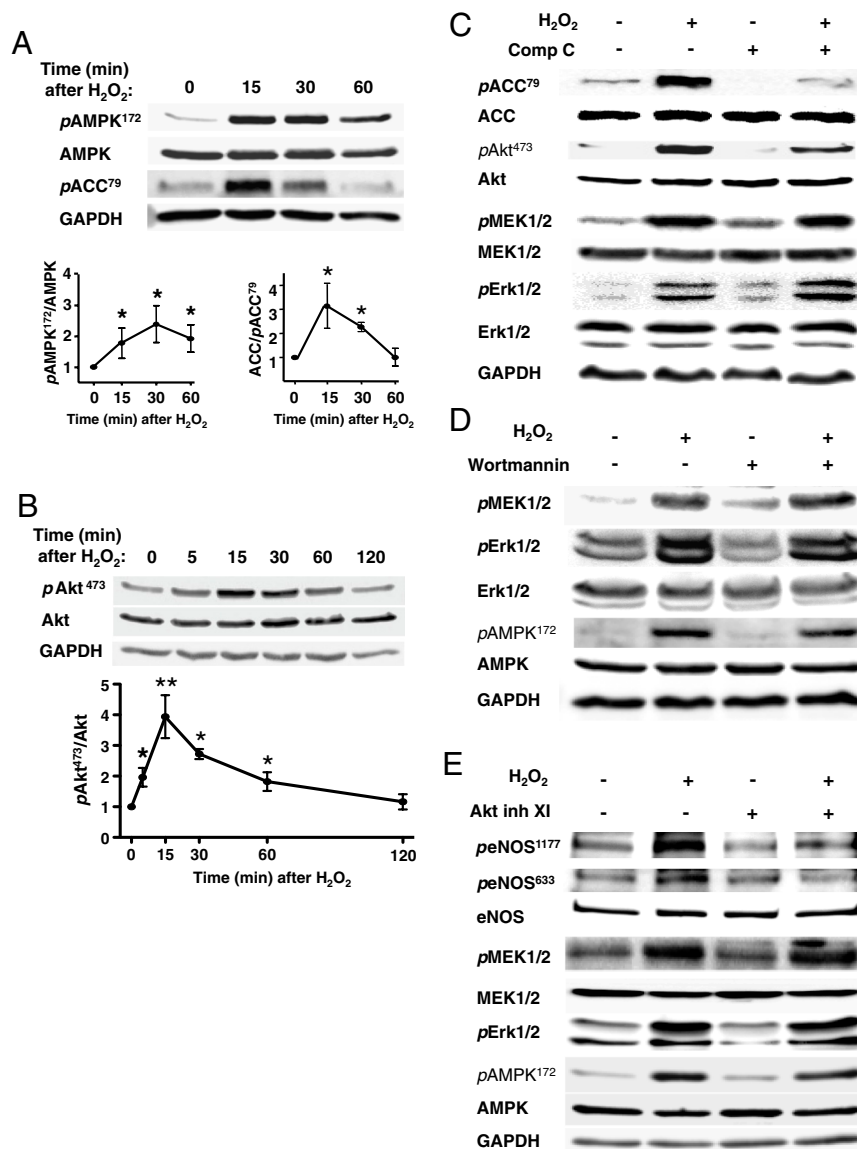

**Fig. S1.** H<sub>2</sub>O<sub>2</sub>-promoted phosphorylation of AMP-activated protein kinase (AMPK) and Akt in cardiac myocytes. (A) Time course for H<sub>2</sub>O<sub>2</sub>-stimulated AMPK phosphorylation at threonine 172 (pAMPK<sup>172</sup>); a representative experiment is shown above and pooled data from three experiments are presented below; \* indicates  $p < 0.05$ . (B) Time course for H<sub>2</sub>O<sub>2</sub>-induced Akt phosphorylation at serine 473 (pAkt<sup>473</sup>); a representative experiment is shown above and pooled data from three experiments are presented below; \* indicates  $p < 0.05$  and \*\* indicates  $p < 0.01$ . (C) Results of immunoblot analyses performed in adult cardiac myocyte lysates prepared from cells incubated with the AMPK inhibitor compound C (Comp C, 20  $\mu$ M, 30 min) before treatment with H<sub>2</sub>O<sub>2</sub> (25  $\mu$ M, 15 min). Immunoblots were probed with antibodies directed against phospho-acetyl-CoA carboxylase (ACC) Ser<sup>79</sup>, phospho-Akt Ser<sup>473</sup>, phospho-mitogen-activated protein kinase kinase-ERK1/2 (MEK1/2) Ser<sup>217/221</sup>, phospho-Erk1/2 Thr<sup>202</sup>/Tyr<sup>204</sup>, ACC, Akt, MEK1/2, Erk1/2, or GAPDH, as indicated. The experiment shown is representative of three independent experiments that yielded similar results. (D) Results of immunoblot analyses performed in adult cardiac myocyte lysates prepared from cells incubated with the PI3K inhibitor wortmannin (1  $\mu$ M, 30 min) before treatment with H<sub>2</sub>O<sub>2</sub> (25  $\mu$ M, 15 min). Immunoblots were probed with antibodies as indicated. The experiment shown is representative of three independent experiments that yielded similar results. (E) Results of immunoblot analyses performed in cell lysates prepared from cardiac myocyte that were incubated with the Akt inhibitor XI (Akt inh XI, 1  $\mu$ M, 30 min) prior treatment with H<sub>2</sub>O<sub>2</sub> (25  $\mu$ M, 15 min); blots were probed with antibodies as shown. The experiment shown is representative of three independent experiments.



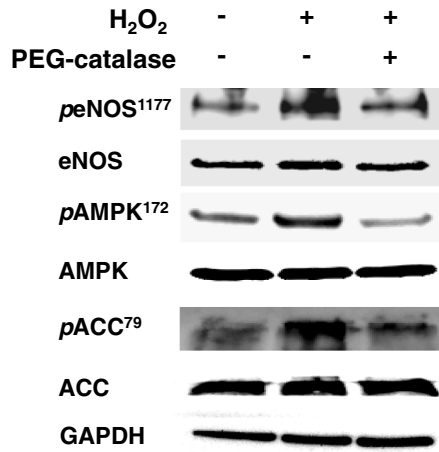

**Fig. 54.** Effects of PEG-catalase on H<sub>2</sub>O<sub>2</sub>-promoted increase in protein phosphorylation. This figure shows the results of immunoblot analyses performed in adult cardiac myocyte lysates prepared from cells either incubated or not with PEG-catalase (100 units/mL, 1 h) before treatment with H<sub>2</sub>O<sub>2</sub> (25 μM, 15 min). Blots were probed with antibodies against phospho-endothelial isoform of nitric oxide synthase (eNOS) Ser<sup>1177</sup>, phospho-AMP-activated protein kinase (AMPK) Thr<sup>172</sup>, phospho-acetyl-CoA carboxylase (ACC) Ser<sup>79</sup>, phospho-mitogen-activated protein kinase kinase-ERK1/2 (MEK1/2) Ser<sup>217/221</sup>, phospho-Erk1/2 Thr<sup>202</sup>/Tyr<sup>204</sup>, ACC, MEK1/2, Erk1/2, or GAPDH as indicated. The experiment shown is representative of three independent experiments that yielded similar results.
